# Supplementary material for: Applying Machine Learning to Identify Anti-Vaccination Tweets during the COVID-19 Pandemic
Source: PubMed Central journal article supplement (PMC8069687; doi:10.3390/ijerph18084069), 2021-04-12
Supplement: ijerph-18-04069-s001.pdf [file ijerph-18-04069-s001.pdf]

Supplementary file

Confusion matrix tables:

|         |                  | Rater 1          |              |       |
|---------|------------------|------------------|--------------|-------|
|         |                  | Not anti-vaccine | Anti-vaccine | Total |
| Rater 2 | Not anti-vaccine | 273              | 0            | 273   |
|         | Anti-vaccine     | 18               | 8            | 26    |
| Total   |                  | 291              | 8            | 299   |

|         |                  | Rater 1          |              |       |
|---------|------------------|------------------|--------------|-------|
|         |                  | Not anti-vaccine | Anti-vaccine | Total |
| Rater 2 | Not anti-vaccine | 781              | 19           | 800   |
|         | Anti-vaccine     | 122              | 78           | 200   |
| Total   |                  | 903              | 97           | 1000  |

|         |                  | Rater 1          |              |       |
|---------|------------------|------------------|--------------|-------|
|         |                  | Not anti-vaccine | Anti-vaccine | Total |
| Rater 2 | Not anti-vaccine | 821              | 24           | 845   |
|         | Anti-vaccine     | 105              | 50           | 155   |
| Total   |                  | 926              | 74           | 1000  |

|         |                  | Rater 1          |              |       |
|---------|------------------|------------------|--------------|-------|
|         |                  | Not anti-vaccine | Anti-vaccine | Total |
| Rater 2 | Not anti-vaccine | 843              | 47           | 890   |
|         | Anti-vaccine     | 40               | 70           | 110   |
| Total   |                  | 883              | 117          | 1000  |

|         |                  | Rater 1          |              |       |
|---------|------------------|------------------|--------------|-------|
|         |                  | Not anti-vaccine | Anti-vaccine | Total |
| Rater 2 | Not anti-vaccine | 826              | 66           | 892   |
|         | Anti-vaccine     | 37               | 68           | 105   |
| Total   |                  | 863              | 134          | 997   |

|         |                  | Rater 1          |              |       |
|---------|------------------|------------------|--------------|-------|
|         |                  | Not anti-vaccine | Anti-vaccine | Total |
| Rater 2 | Not anti-vaccine | 807              | 59           | 866   |
|         | Anti-vaccine     | 55               | 76           | 131   |
| Total   |                  | 862              | 135          | 997   |

|         |                  | Rater 1          |              |       |
|---------|------------------|------------------|--------------|-------|
|         |                  | Not anti-vaccine | Anti-vaccine | Total |
| Rater 2 | Not anti-vaccine | 1302             | 64           | 1366  |
|         | Anti-vaccine     | 106              | 151          | 257   |
| Total   |                  | 1408             | 215          | 1623  |

|         |                  | Rater 1          |              |       |
|---------|------------------|------------------|--------------|-------|
|         |                  | Not anti-vaccine | Anti-vaccine | Total |
| Rater 2 | Not anti-vaccine | 854              | 32           | 886   |
|         | Anti-vaccine     | 66               | 45           | 111   |
|         | Total            | 920              | 77           | 997   |

|         |                  | Rater 1          |              |       |
|---------|------------------|------------------|--------------|-------|
|         |                  | Not anti-vaccine | Anti-vaccine | Total |
| Rater 2 | Not anti-vaccine | 913              | 17           | 930   |
|         | Anti-vaccine     | 46               | 21           | 67    |
|         | Total            | 959              | 38           | 997   |

|         |                  | Rater 1          |              |       |
|---------|------------------|------------------|--------------|-------|
|         |                  | Not anti-vaccine | Anti-vaccine | Total |
| Rater 2 | Not anti-vaccine | 825              | 85           | 910   |
|         | Anti-vaccine     | 20               | 67           | 87    |
|         | Total            | 845              | 152          | 997   |

|         |                  | Rater 1          |              |       |
|---------|------------------|------------------|--------------|-------|
|         |                  | Not anti-vaccine | Anti-vaccine | Total |
| Rater 2 | Not anti-vaccine | 887              | 18           | 905   |
|         | Anti-vaccine     | 53               | 39           | 92    |
|         | Total            | 940              | 57           | 997   |

|         |                  | Rater 1          |              |       |
|---------|------------------|------------------|--------------|-------|
|         |                  | Not anti-vaccine | Anti-vaccine | Total |
| Rater 2 | Not anti-vaccine | 918              | 40           | 958   |
|         | Anti-vaccine     | 15               | 24           | 39    |
|         | Total            | 933              | 64           | 997   |

|         |                  | Rater 1          |              |       |
|---------|------------------|------------------|--------------|-------|
|         |                  | Not anti-vaccine | Anti-vaccine | Total |
| Rater 2 | Not anti-vaccine | 829              | 74           | 903   |
|         | Anti-vaccine     | 29               | 65           | 94    |
|         | Total            | 858              | 139          | 997   |

|         |                  | Rater 1          |              |       |
|---------|------------------|------------------|--------------|-------|
|         |                  | Not anti-vaccine | Anti-vaccine | Total |
| Rater 2 | Not anti-vaccine | 865              | 37           | 902   |
|         | Anti-vaccine     | 61               | 34           | 95    |
|         | Total            | 926              | 71           | 997   |

|         |                  | Rater 1          |              |       |
|---------|------------------|------------------|--------------|-------|
|         |                  | Not anti-vaccine | Anti-vaccine | Total |
| Rater 2 | Not anti-vaccine | 844              | 30           | 874   |

|  |              |     |    |     |
|--|--------------|-----|----|-----|
|  | Anti-vaccine | 63  | 60 | 123 |
|  | Total        | 907 | 90 | 997 |

|         |                  | Rater 1          |              |       |
|---------|------------------|------------------|--------------|-------|
|         |                  | Not anti-vaccine | Anti-vaccine | Total |
| Rater 2 | Not anti-vaccine | 861              | 25           | 886   |
|         | Anti-vaccine     | 64               | 47           | 111   |
|         | Total            | 925              | 72           | 997   |

|         |                  | Rater 1          |              |       |
|---------|------------------|------------------|--------------|-------|
|         |                  | Not anti-vaccine | Anti-vaccine | Total |
| Rater 2 | Not anti-vaccine | 869              | 39           | 908   |
|         | Anti-vaccine     | 32               | 57           | 89    |
|         | Total            | 901              | 96           | 997   |

|         |                  | Rater 1          |              |       |
|---------|------------------|------------------|--------------|-------|
|         |                  | Not anti-vaccine | Anti-vaccine | Total |
| Rater 2 | Not anti-vaccine | 879              | 39           | 918   |
|         | Anti-vaccine     | 40               | 39           | 79    |
|         | Total            | 919              | 78           | 997   |

|         |                  | Rater 1          |              |       |
|---------|------------------|------------------|--------------|-------|
|         |                  | Not anti-vaccine | Anti-vaccine | Total |
| Rater 2 | Not anti-vaccine | 882              | 33           | 915   |
|         | Anti-vaccine     | 38               | 44           | 82    |
|         | Total            | 920              | 77           | 997   |

|         |                  | Rater 1          |              |       |
|---------|------------------|------------------|--------------|-------|
|         |                  | Not anti-vaccine | Anti-vaccine | Total |
| Rater 2 | Not anti-vaccine | 897              | 13           | 910   |
|         | Anti-vaccine     | 51               | 36           | 87    |
|         | Total            | 948              | 49           | 997   |

|         |                  | Rater 1          |              |       |
|---------|------------------|------------------|--------------|-------|
|         |                  | Not anti-vaccine | Anti-vaccine | Total |
| Rater 2 | Not anti-vaccine | 870              | 58           | 928   |
|         | Anti-vaccine     | 20               | 49           | 69    |
|         | Total            | 890              | 107          | 997   |

## Examples of prediction

---

### Anti-vaccine

*#coronavirus Watch the elites. If they don't succumb at rates similar to the rest of the population, suspect a vaccine in use. Watch the Davos crowd, to see if this is a Globalist depopulation stunt.*

---

*The #MSM will use this so called #coronavirus in order to promote toxic autism causing #vaccines f\*\*\* globalists #AmericaFirst*

---

*@99freemind It would make complete sense that the whole coronavirus story is a racket with the goal of scaring a large part of the world population to willingly get "experimental" vaccine shots with serious side-effects that are actually the hidden main-effect.*

---

### Not anti-vaccine

*Primary care has always been free regardless of immigration status, but most people without status aren't registered with a GP.*

*@DHSCgovuk must go further so that everyone can access the Covid-19 vaccine, regardless of immigration status. #VaccinesForAll  
<https://t.co/4x9TVEIj4s>*

---

*This coronavirus isn't new. Seems it was to be used in vaccines etc from earlier on in the decade.  
<https://t.co/boJMyGhGqD>*

---

*Lebanon races to vaccinate population as COVID-19 deaths rise <https://t.co/6uGolG7XMn>  
#politics #feedly*

---
